# Supplementary material
Source: publisher site journal article supplement (https://www.spandidos-publications.com/1309/downloadSupplementary)

Figure S1. Sample clustering tree and metastasis traits of tumor samples. Red color represents metastatic tumor samples, whereas white represents non-metastatic tumor samples.

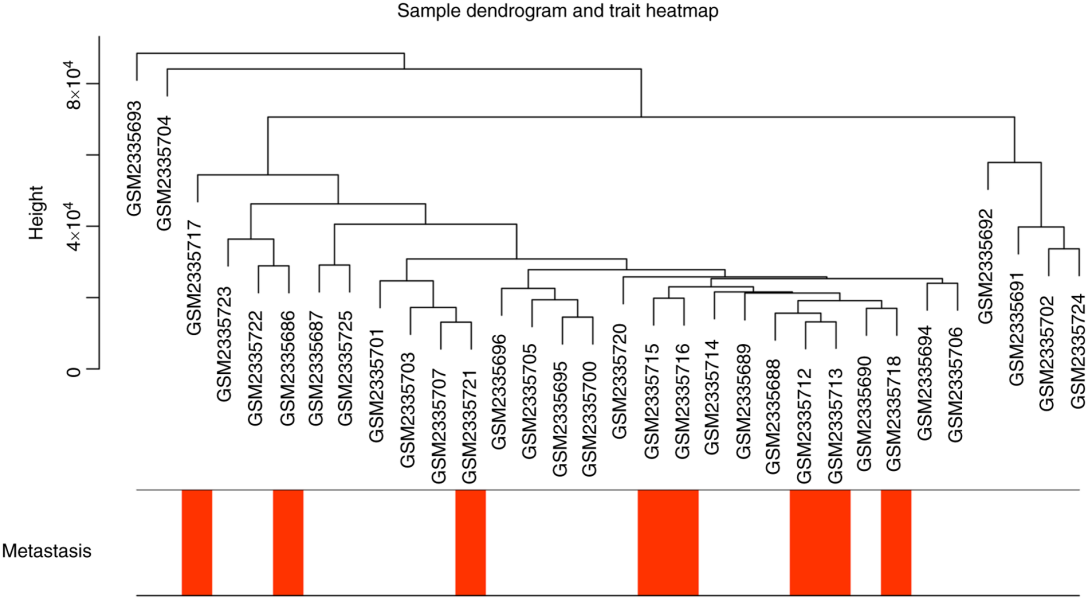

Supplement: Supplementary file 1 [file downloadSupplementary]
